# Supplementary material for: Novel narrow-band blue-emitting Cs3Zn6B9O21:Bi3+phosphor with superior thermal stability
Source: Royal Society of Chemistry journal article supplement (doi:10.1039/d0ce00893a), 2020-01-01
Supplement: d0ce00893a1.pdf [file d0ce00893a1.pdf]

## Supplementary information

### Novel narrow-band blue-emitting $\text{Cs}_3\text{Zn}_6\text{B}_9\text{O}_{21}:\text{Bi}^{3+}$ phosphor with superior thermal stability

Mengyu Guan, Wei Wang, Wei Yan, Guogang Li\*

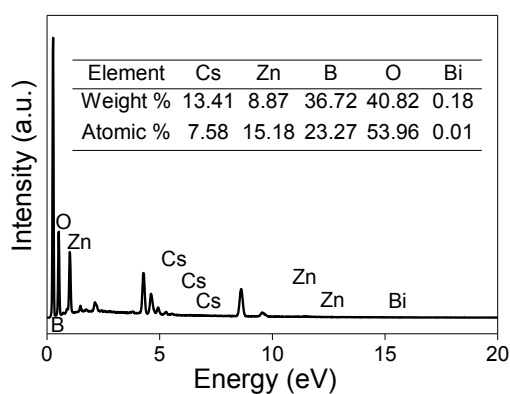

Figure S1 EDX spectrum of  $\text{CZBO}:\text{0.02Bi}^{3+}$  sample.

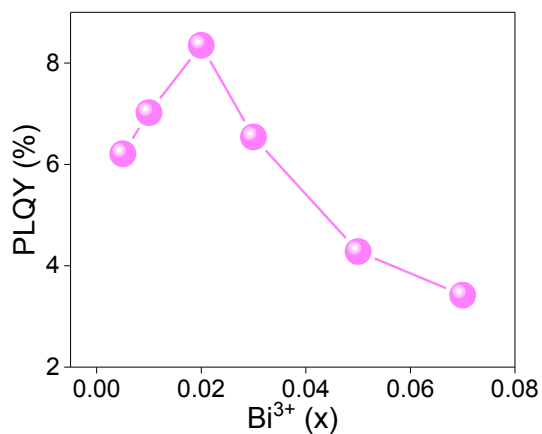

Figure S2. The internal quantum yields of  $\text{CZBO}:\text{Bi}^{3+}$  ( $x = 0.005, 0.01, 0.02, 0.03, 0.05$ ) phosphors.

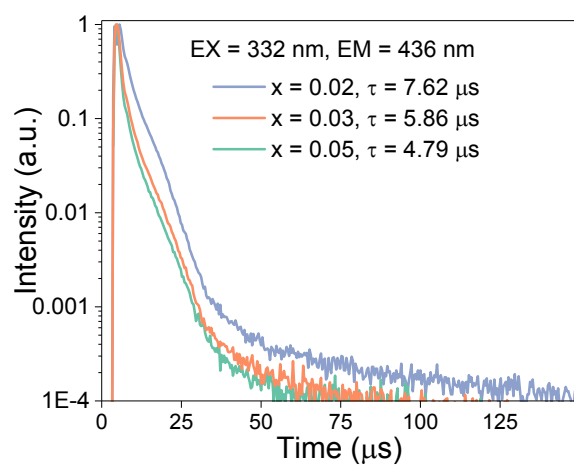

Figure S3. Photoluminescence decay curves of the CZBO:Bi<sup>3+</sup> ( $x = 0.02, 0.03, 0.05$ ) samples.
